# Supplementary material for: Effect of heterozygous deletions on phenotypic changes and dosage compensation in Arabidopsis thaliana
Source: Springer Nature journal article supplement (doi:10.1038/s41598-025-98141-6), 2025-05-13
Supplement: MOESM2 [file 41598_2025_98141_MOESM2_ESM.pdf]

# Supplemental Figure 1

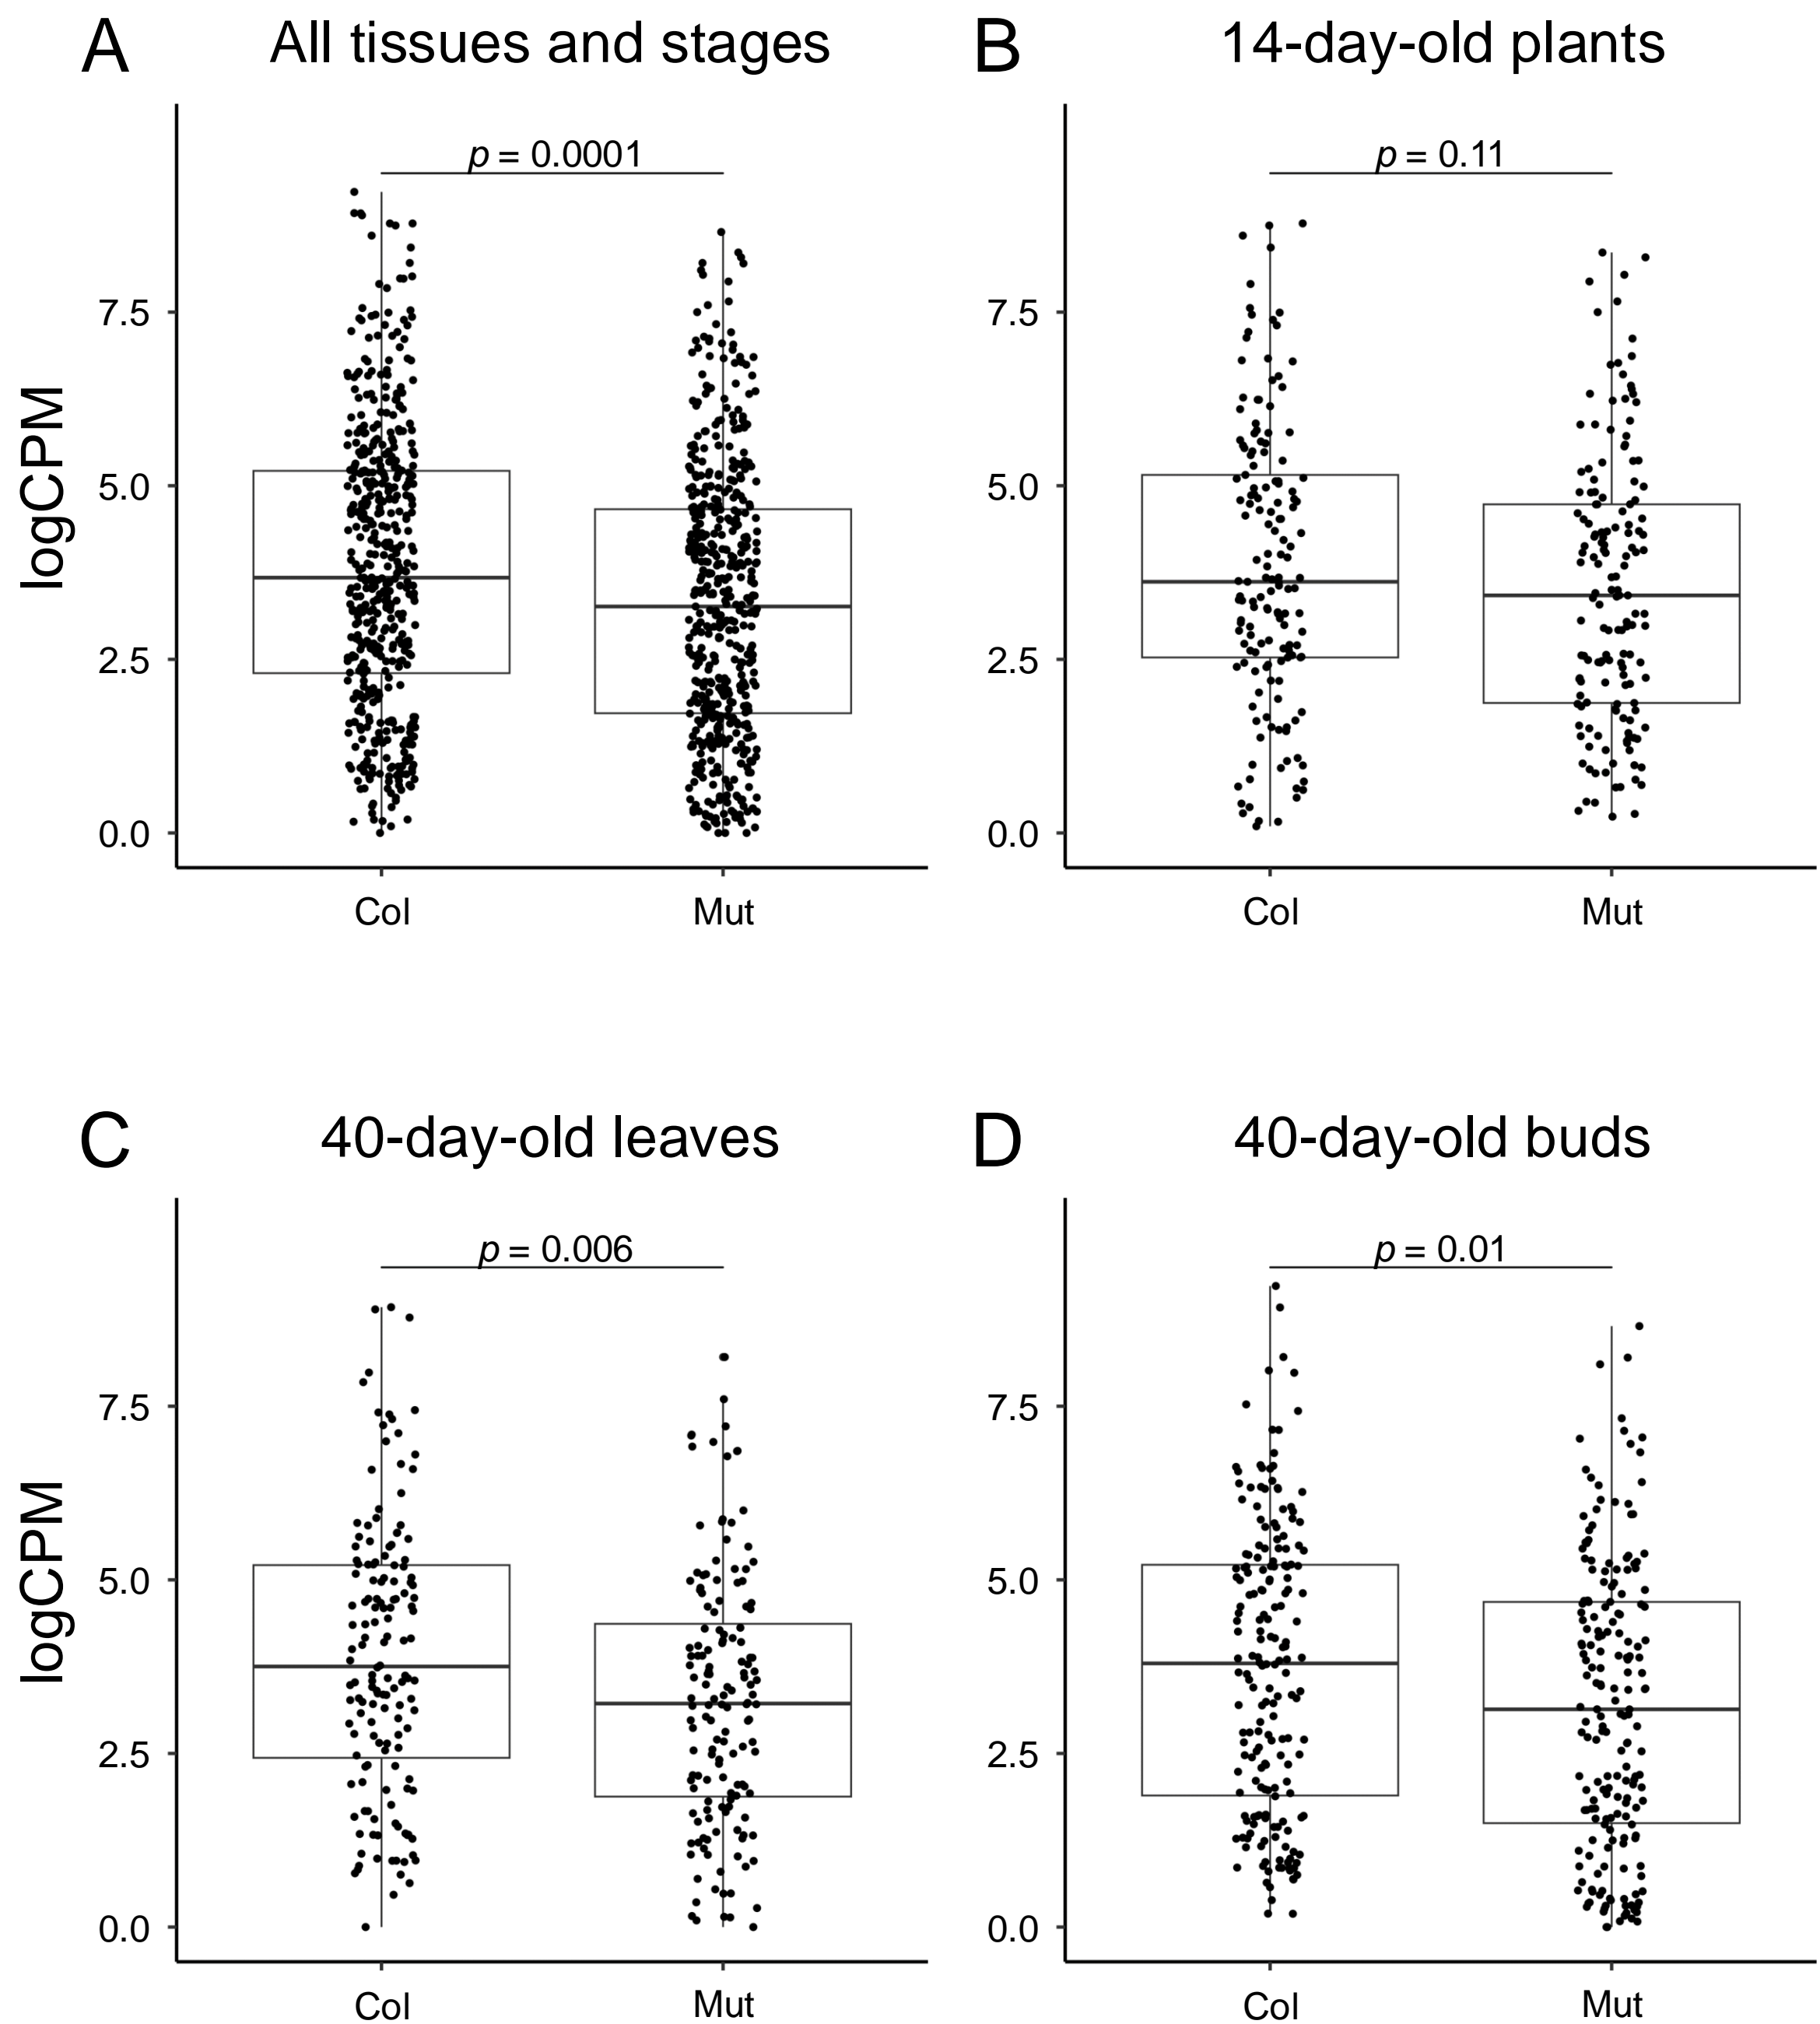

**Fig. S1** Comparison of gene expression levels inside the deletions between Col-0 and the mutant for all tissues and stages (A), 14-day-old plants (B), 40-day-old leaves (C), and 40-day-old flower buds (D). Statistical significance is indicated as \*\*\* $p < 0.001$ , \*\* $p < 0.01$ , \* $p < 0.05$ , and ns, not significant (Welch's  $t$ -test).

## Supplemental Figure 2

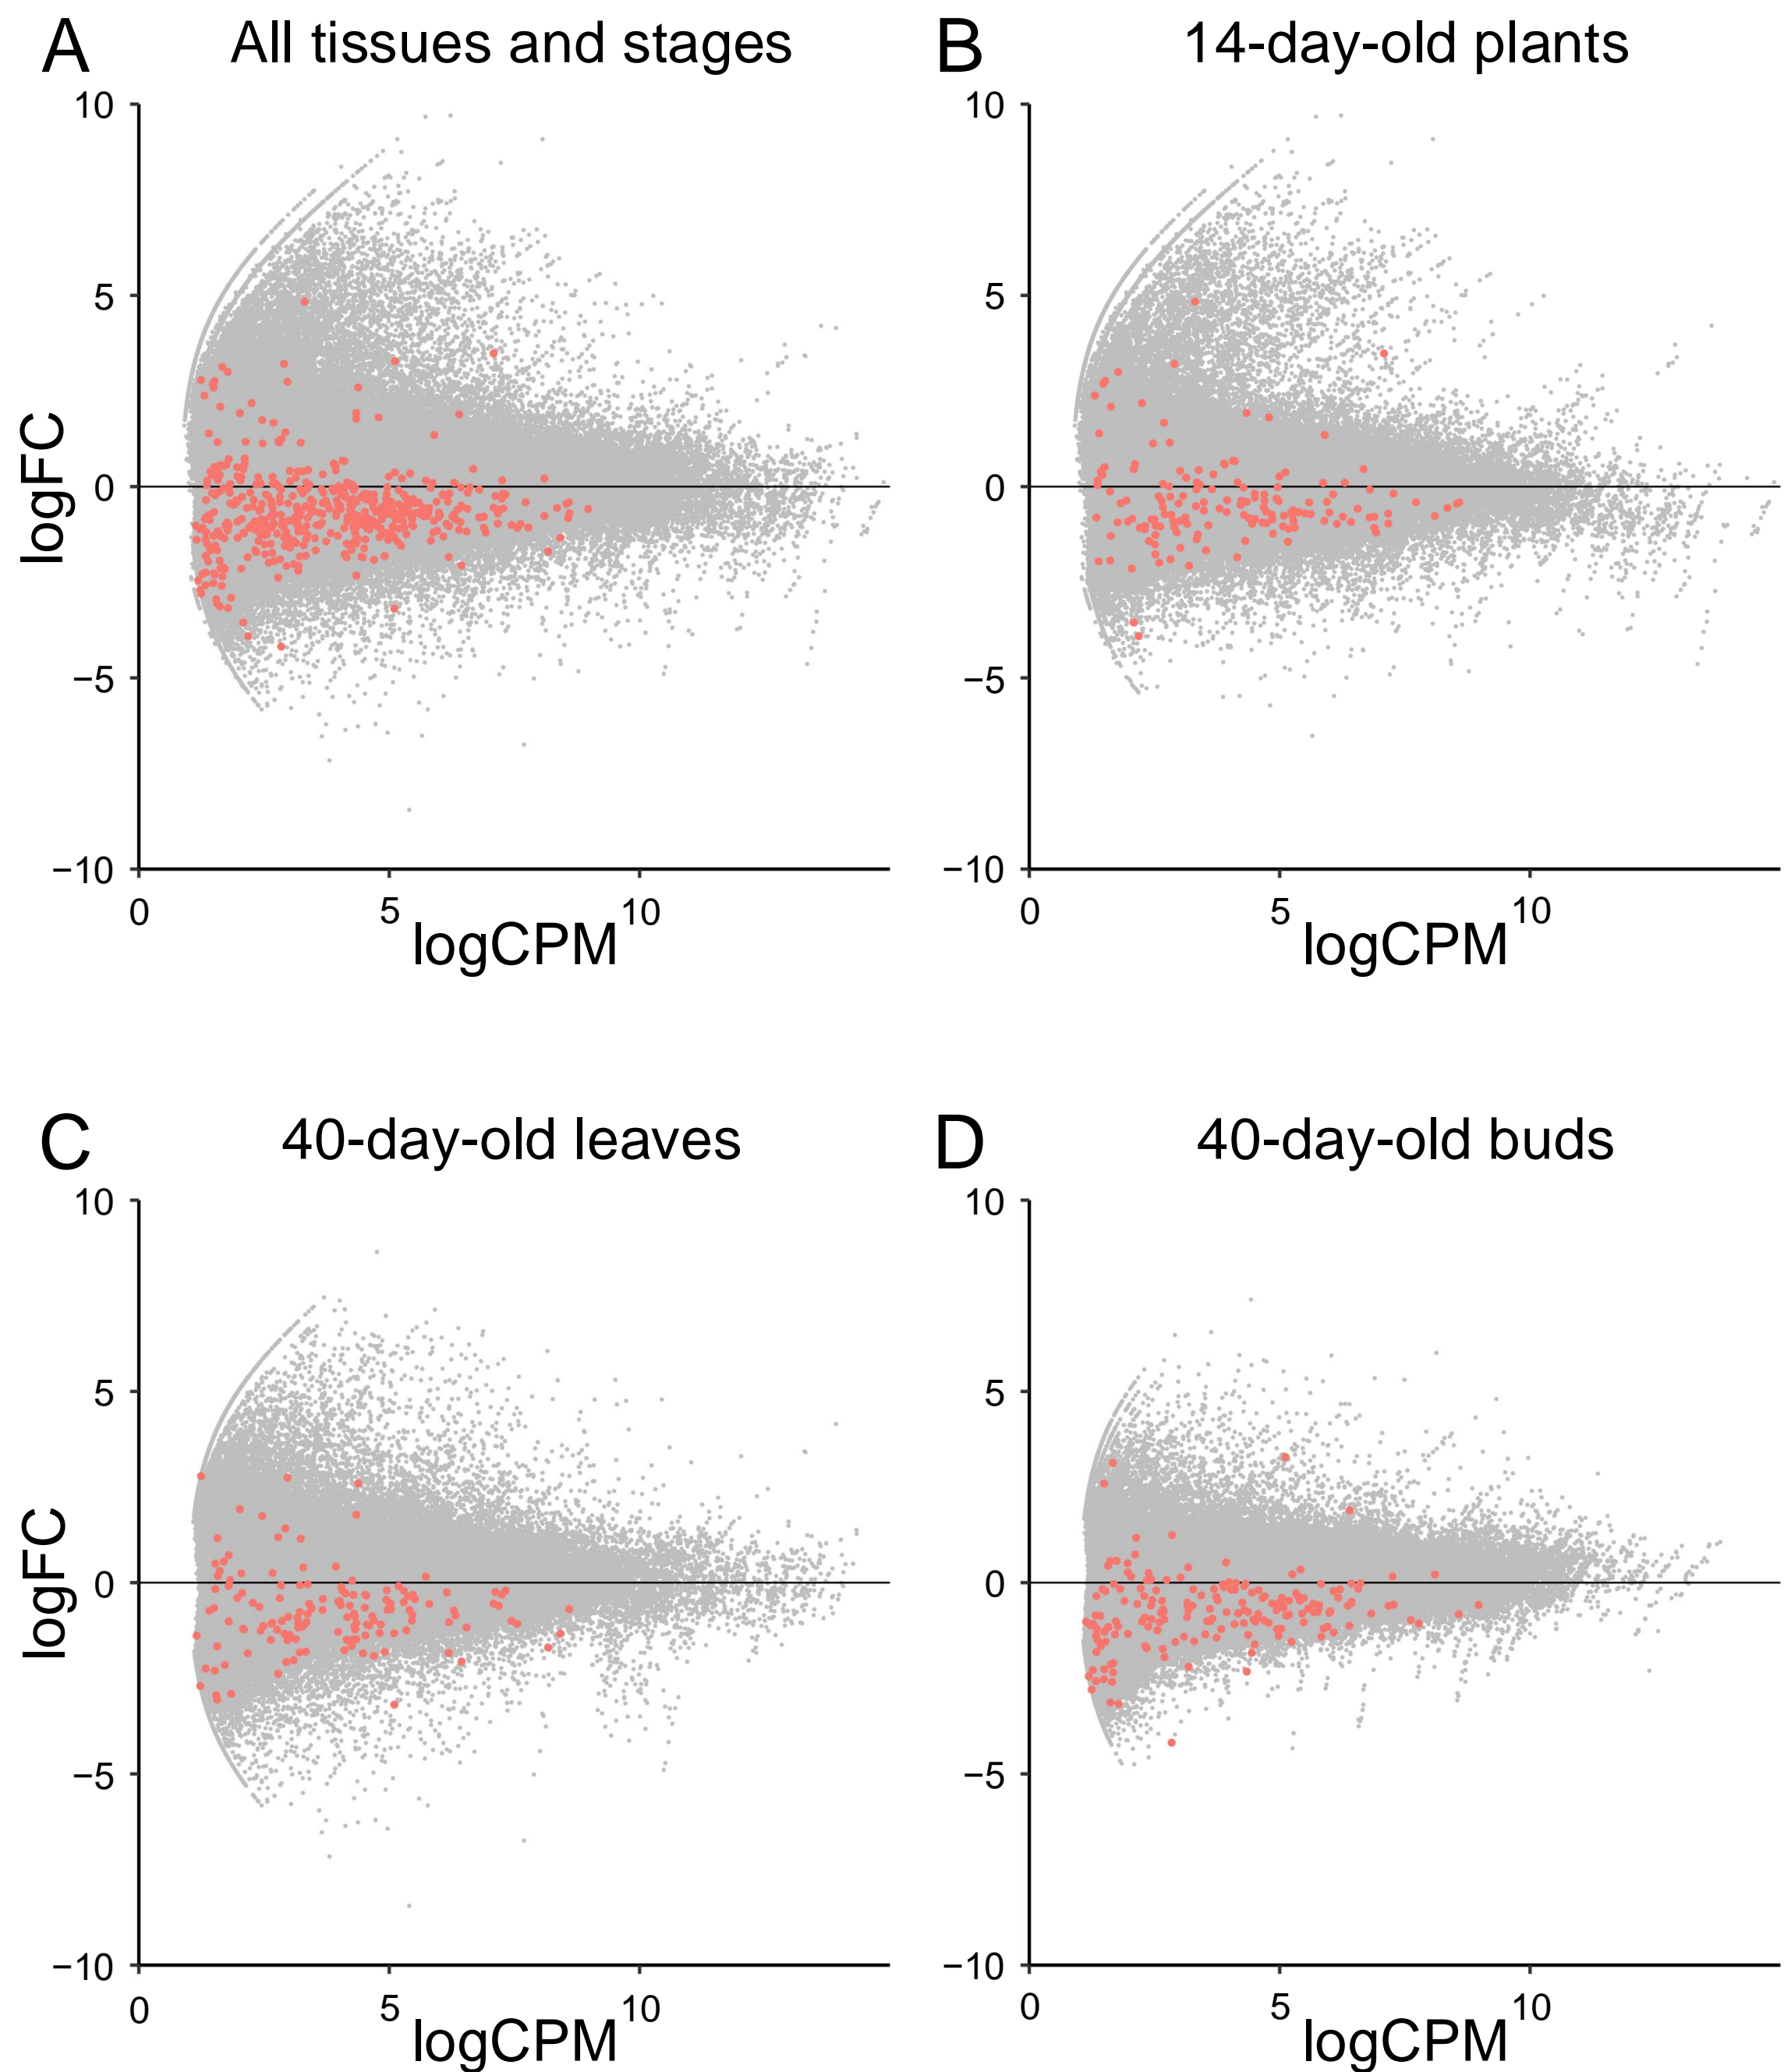

**Fig. S2** MA plot with mean gene expression on the horizontal axis and gene expression ratio of mutants to Col-0 on the vertical axis, for all tissues and stages (A), 14-day-old plants (B), 40-day-old leaves (C), and 40-day-old flower buds (D). Red plots indicate intra-deletion genes, and gray plots indicate extra-deletion genes.

## Supplemental Figure 3

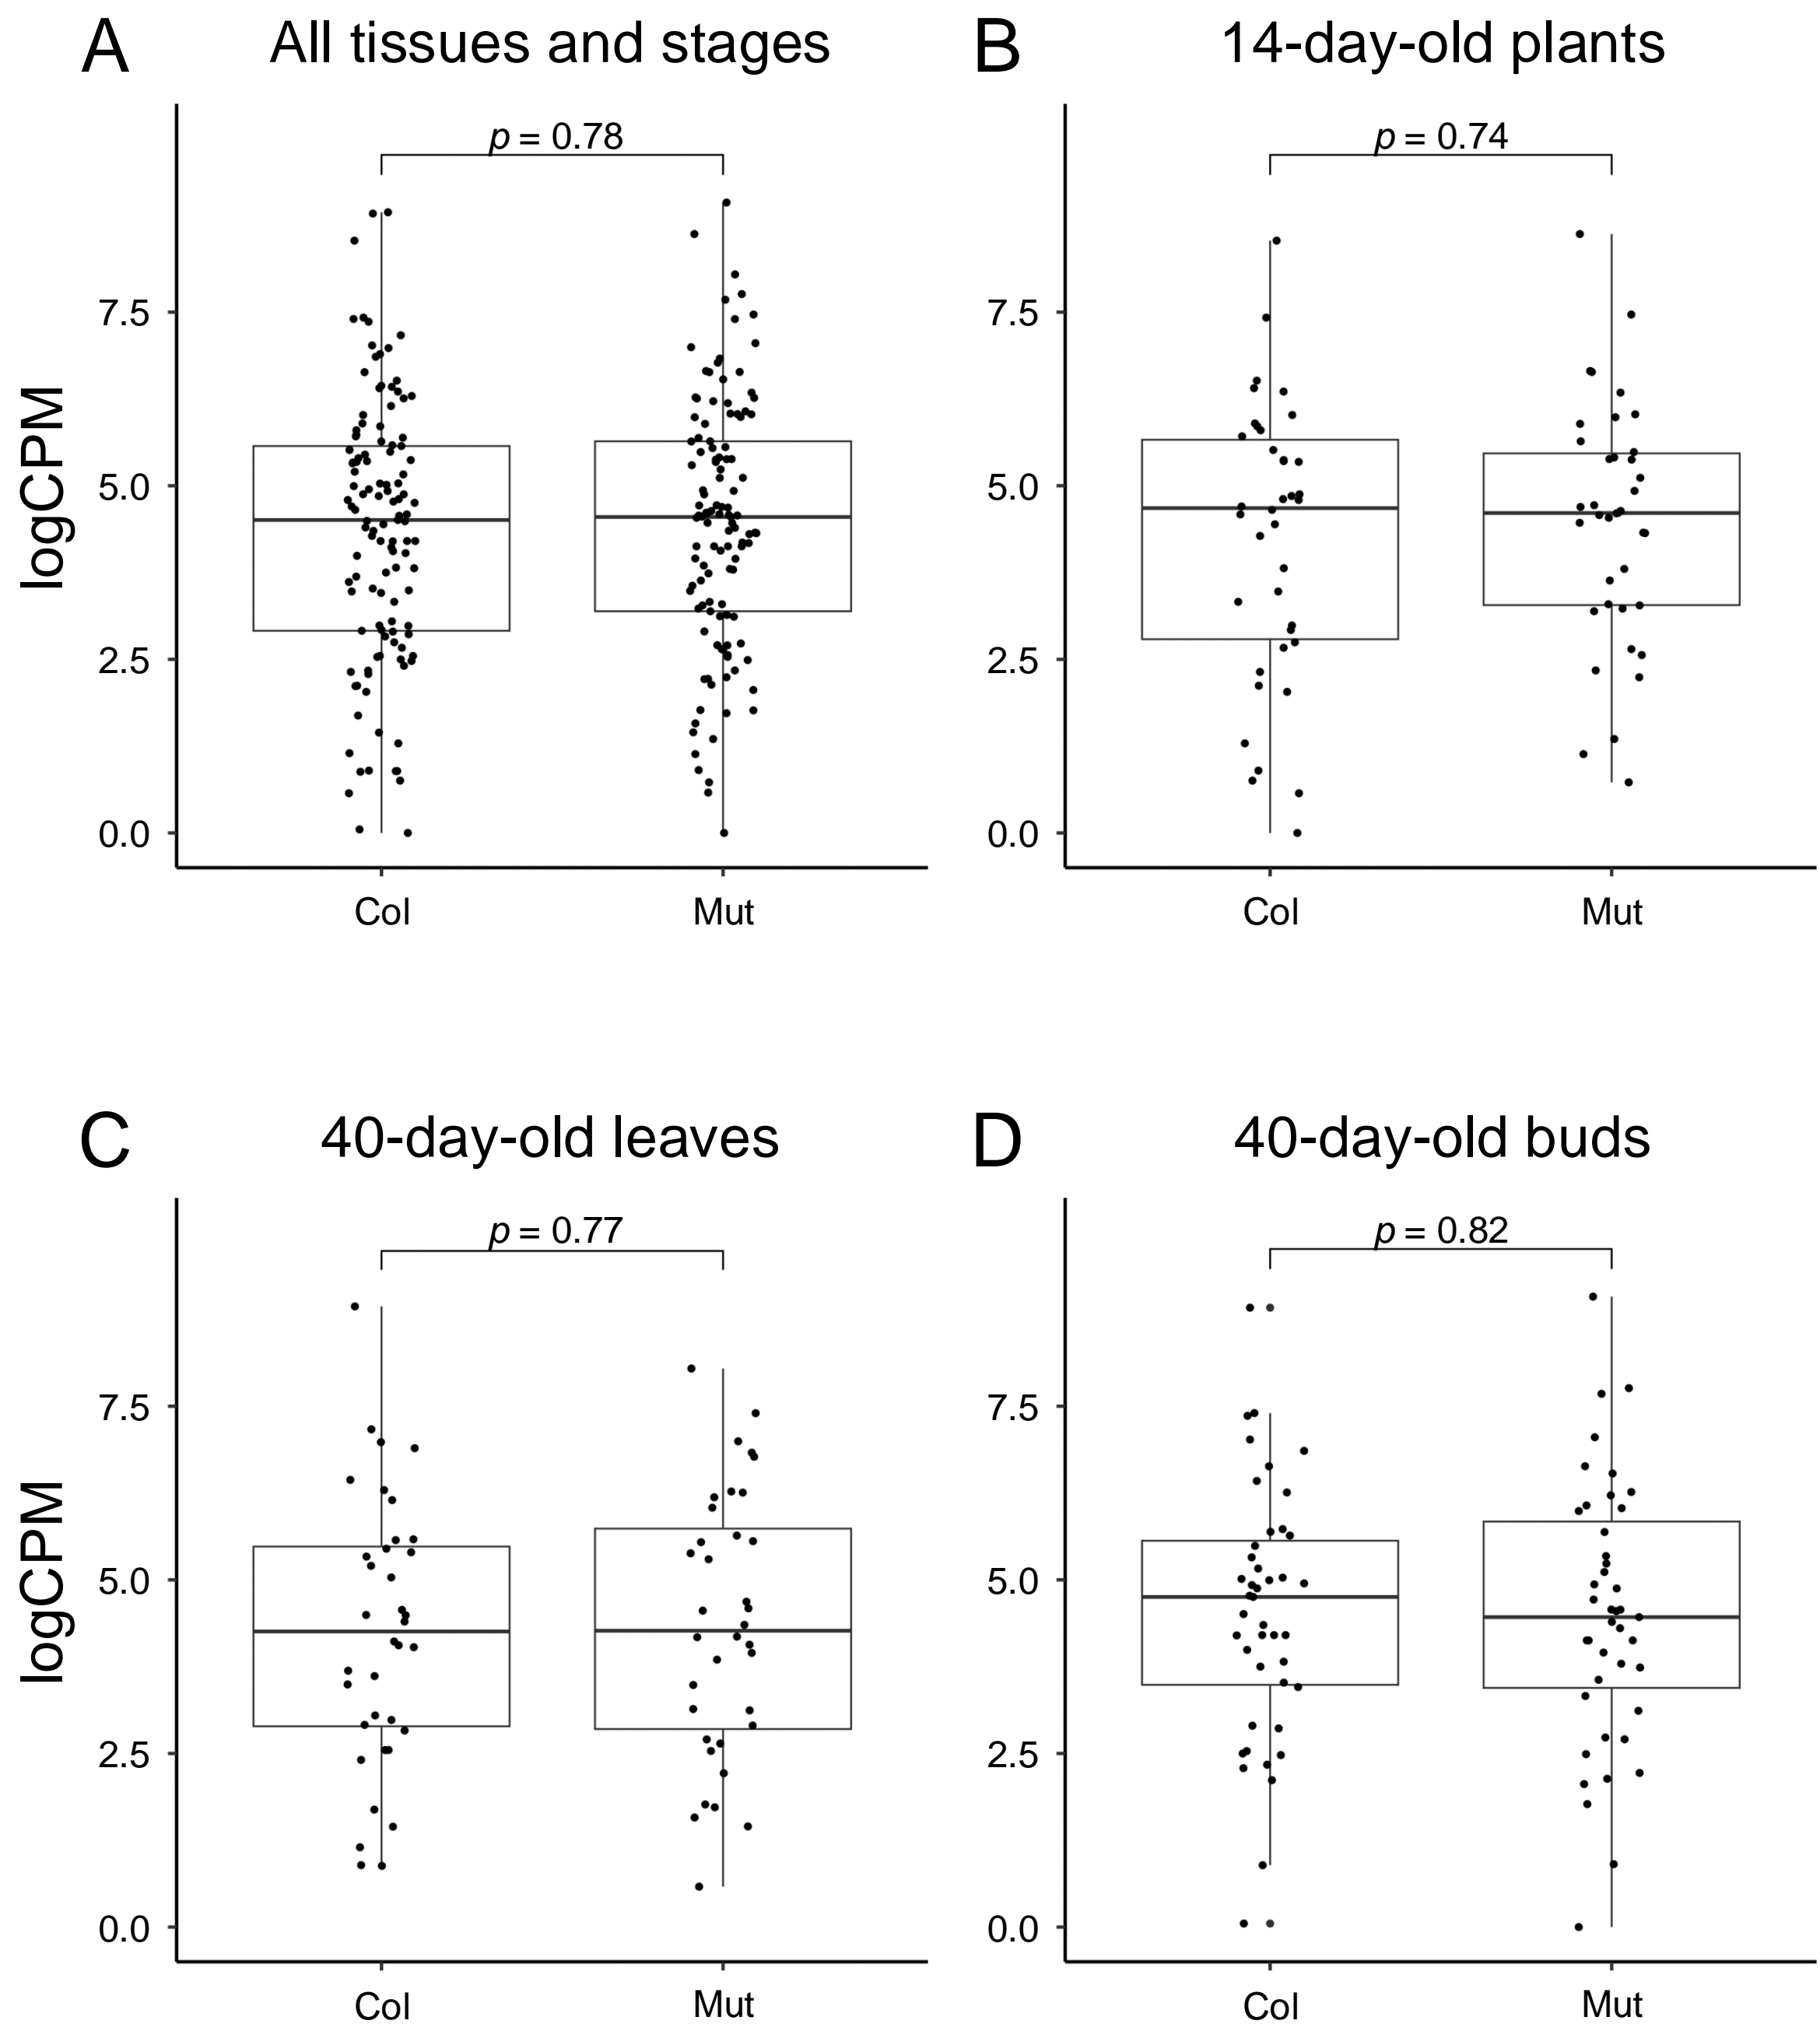

**Fig. S3** Comparison of expression levels of DBGs present outside the deletion paired with DBGs inside the deletions between Col-0 and the mutant for all tissues and stages (A), 14-day-old plants (B), 40-day-old leaves (C), and 40-day-old flower buds (D). No significant differences were detected (Welch's *t*-test).
